# Supplementary material
Source: PubMed Central journal article supplement (PMC2888607)
Supplement: NIHMS140593-supplement-Corrigendum.pdf [file NIHMS140593-supplement-Corrigendum.pdf]

## Corrigendum

### The $\alpha 3$ subunit gene of the nicotinic acetylcholine receptor is a candidate gene for ethanol stimulation

H. M. Kamens, C. S. McKinnon, N. Li, M. L. Helms, J. K. Belknap and T. J. Phillips

*Genes Brain Behav* (2008) doi: 10.1111/j.1601-183X.2008.00444.x

Figure 1 was incorrectly labeled in Kamens *et al.* (2008) showing D9Mit18 at 17, rather than 71, cM. The correct figure is printed below. We apologize for this error.

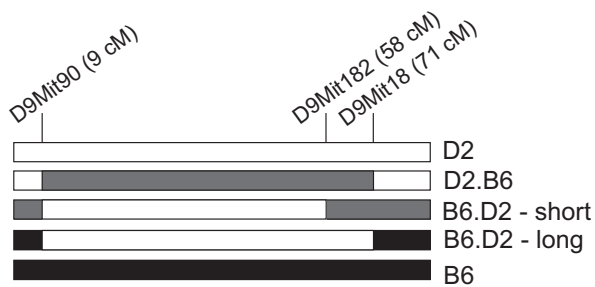

**Figure 1: A graphical depiction of the chromosome 9 congenic mice.** Black represents B6 alleles and white represents D2 alleles. The markers listed are those that define the ends of the congenic interval.
